# Supplementary material
Source: MDPI journal article supplement (https://www.mdpi.com/2306-5338/6/3/67)
Supplement: s1 [file s1]

**Table S5:** Summary of z test, 2-sample *t* test, *F* test, Wilcoxon rank sum test and flow duration analysis.

| Monitoring Station |            |               | Wilcoxon Rank Sum Result               | z and 2-sample <i>t</i> tests              |                                     |                                      |         | <i>F</i> test Result                                    | Flow Duration (%) |           |            |
|--------------------|------------|---------------|----------------------------------------|--------------------------------------------|-------------------------------------|--------------------------------------|---------|---------------------------------------------------------|-------------------|-----------|------------|
| ID                 | DA (acres) | DA (hectares) |                                        | Result                                     | Pre-Mine Log <sub>10</sub> <i>M</i> | Post-Mine Log <sub>10</sub> <i>M</i> | MPC (%) |                                                         | Pre-Mine          | Post-Mine | Difference |
| 1                  | 790        | 319           | 1 ( <i>z</i> = -1.99, <i>p</i> < .05)  | 1; <i>z</i> (61) = -1.90, <i>p</i> > .05   | 2.16                                | 2.42                                 | 12%     | 1 ( <i>F</i> <sub>61,89</sub> = 1.13, <i>p</i> > .05)   | 0.0               | 0.0       | 0          |
| 2                  | 556        | 225           | 2 ( <i>z</i> = -0.22, <i>p</i> > .05)  | 2; <i>z</i> (72) = 0.05, <i>p</i> > .05    | 1.74                                | 1.73                                 | -1%     | 2 ( <i>F</i> <sub>78,72</sub> = 1.10, <i>p</i> > .05)   | 5.6               | 7.5       | -2         |
| 3                  | 458        | 185           | 3 ( <i>z</i> = -0.88, <i>p</i> > .05)  | 3; <i>z</i> (39) = -0.95, <i>p</i> > .05   | 1.80                                | 1.99                                 | 11%     | 3 ( <i>F</i> <sub>39,79</sub> = 1.10, <i>p</i> > .05)   | 5.6               | 4.3       | 1          |
| 4                  | 400        | 162           | 4 ( <i>z</i> = -6.23, <i>p</i> < .01)  | 4; <i>z</i> (70) = -7.56, <i>p</i> < .01   | 0.90                                | 2.11                                 | 134%    | 4 ( <i>F</i> <sub>70,92</sub> = 3.42, <i>p</i> < .01)   | 4.0               | 1.1       | 3          |
| 5                  | 206        | 83            | 5 ( <i>z</i> = 3.22, <i>p</i> < .01)   | 5; <i>z</i> (66) = 3.53, <i>p</i> < .01    | 1.48                                | 0.75                                 | -49%    | 5 ( <i>F</i> <sub>93,66</sub> = 1.54, <i>p</i> > .05)   | 18.2              | 33.0      | -15        |
| 6                  | 61         | 25            | 6 ( <i>z</i> = 0.52, <i>p</i> > .05)   | 6; <i>z</i> (115) = 0.40, <i>p</i> > .05   | 0.75                                | 0.70                                 | -7%     | 6 ( <i>F</i> <sub>116,115</sub> = 1.23, <i>p</i> > .05) | 15.0              | 5.7       | 9          |
| 7                  | 122        | 49            | 7 ( <i>z</i> = -1.75, <i>p</i> > .05)  | 7; <i>z</i> (34) = 2.01, <i>p</i> < .05    | 0.83                                | 0.26                                 | -69%    | 7 ( <i>F</i> <sub>34,42</sub> = 1.73, <i>p</i> > .05)   | 9.0               | 51.0      | -42        |
| 8                  | 71         | 29            | 8 ( <i>z</i> = 1.44, <i>p</i> > .05)   | 8; <i>z</i> (37) = -1.07, <i>p</i> > .05   | 0.83                                | 1.03                                 | 24%     | 8 ( <i>F</i> <sub>37,43</sub> = 1.50, <i>p</i> > .05)   | 2.0               | 3.0       | -1         |
| 9                  | 32         | 13            | 9 ( <i>z</i> = -2.25, <i>p</i> < .05)  | 9; <i>t</i> (23) = -2.23, <i>p</i> < .01   | 0.98                                | 1.33                                 | 36%     | 9 ( <i>F</i> <sub>14,9</sub> = 1.23, <i>p</i> > .05)    | 14.0              | 0.0       | 14         |
| 10                 | 170        | 69            | 10 ( <i>z</i> = 3.47, <i>p</i> < .01)  | 10; <i>z</i> (50) = 3.66, <i>p</i> < .01   | 0.93                                | 0.10                                 | -89%    | 10 ( <i>F</i> <sub>108,50</sub> = 1.18, <i>p</i> > .05) | 21.0              | 55.0      | -34        |
| 11                 | 152        | 61            | 11 ( <i>z</i> = 2.01, <i>p</i> < .05)  | 11; <i>z</i> (61) = 2.31, <i>p</i> < .05   | 0.95                                | 0.52                                 | -45%    | 11 ( <i>F</i> <sub>113,61</sub> = 1.54, <i>p</i> > .05) | 15.0              | 39.0      | -24        |
| 12                 | 100        | 40            | 12 ( <i>z</i> = 1.74, <i>p</i> > .05)  | 12; <i>z</i> (47) = 1.80, <i>p</i> > .05   | 0.74                                | 0.41                                 | -45%    | 12 ( <i>F</i> <sub>114,47</sub> = 1.12, <i>p</i> > .05) | 21.0              | 26.0      | -5         |
| 13                 | 31         | 13            | 13 ( <i>z</i> = 3.67, <i>p</i> < .01)  | 13; <i>z</i> (44) = 4.03, <i>p</i> < .01   | 0.47                                | (0.16)                               | -134%   | 13 ( <i>F</i> <sub>110,44</sub> = 1.48, <i>p</i> > .05) | 8.0               | 50.0      | -42        |
| 14                 | 1839       | 743           | 14 ( <i>z</i> = -5.45, <i>p</i> < .01) | 14; <i>z</i> (81) = -5.81, <i>p</i> < .01  | 1.42                                | 2.87                                 | 102%    | 14 ( <i>F</i> <sub>81,90</sub> = 2.42, <i>p</i> < .01)  | 35.1              | 8.0       | 27         |
| 15                 | 1442       | 583           | 15 ( <i>z</i> = -6.58, <i>p</i> < .01) | 15; <i>z</i> (81) = -6.47, <i>p</i> < .01  | 1.76                                | 2.94                                 | 67%     | 15 ( <i>F</i> <sub>81,104</sub> = 1.89, <i>p</i> < .05) | 1.0               | 0.0       | 1          |
| 16                 | 1150       | 465           | 16 ( <i>z</i> = 3.49, <i>p</i> < .01)  | 16; <i>z</i> (30) = -5.49, <i>p</i> < .01  | 1.87                                | 2.60                                 | 39%     | 16 ( <i>F</i> <sub>146,30</sub> = 3.86, <i>p</i> < .01) | 2.0               | 0.0       | 2          |
| 17                 | 1065       | 430           | 17 ( <i>z</i> = 4.44, <i>p</i> < .01)  | 17; <i>z</i> (38) = -5.84, <i>p</i> < .01  | 1.63                                | 2.45                                 | 50%     | 17 ( <i>F</i> <sub>100,38</sub> = 2.42, <i>p</i> < .01) | 0.0               | 0.0       | 0          |
| 18                 | 418        | 169           | 18 ( <i>z</i> = 1.16, <i>p</i> > .05)  | 18; <i>z</i> (35) = -3.48, <i>p</i> < .01  | 1.48                                | 2.08                                 | 41%     | 18 ( <i>F</i> <sub>130,35</sub> = 5.01, <i>p</i> < .01) | 21.0              | 0.0       | 21         |
| 19                 | 153        | 62            | 19 ( <i>z</i> = 5.53, <i>p</i> < .01)  | 19; <i>z</i> (70) = -7.23, <i>p</i> < .01  | 0.08                                | 1.35                                 | >200%   | 19 ( <i>F</i> <sub>113,70</sub> = 1.84, <i>p</i> < .05) | 56.1              | 8.5       | 48         |
| 20                 | 136        | 55            | 20 ( <i>z</i> = 1.75, <i>p</i> > .05)  | 20; <i>z</i> (65) = -3.41, <i>p</i> < .01  | 1.05                                | 1.54                                 | 47%     | 20 ( <i>F</i> <sub>88,65</sub> = 3.27, <i>p</i> < .01)  | 10.5              | 4.2       | 6          |
| 21                 | 101        | 41            | 21 ( <i>z</i> = -4.40, <i>p</i> < .01) | 21; <i>z</i> (61) = -8.66, <i>p</i> < .01  | 0.76                                | 1.59                                 | 109%    | 21 ( <i>F</i> <sub>61,67</sub> = 1.56, <i>p</i> > .05)  | 1.6               | 0.0       | 2          |
| 22                 | 36         | 15            | 22 ( <i>z</i> = 4.33, <i>p</i> < .01)  | 22; <i>z</i> (47) = 5.10, <i>p</i> < .01   | 0.14                                | (0.75)                               | <-200%  | 22 ( <i>F</i> <sub>47,66</sub> = 3.09, <i>p</i> < .01)  | 13.8              | 83.5      | -70        |
| 23                 | 242        | 98            | 23 ( <i>z</i> = 7.42, <i>p</i> < .01)  | 23; <i>z</i> (71) = -11.26, <i>p</i> < .01 | 1.15                                | 2.27                                 | 97%     | 23 ( <i>F</i> <sub>256,71</sub> = 6.20, <i>p</i> < .01) | 13.0              | 0.0       | 13         |
| 24                 | 216        | 87            | 24 ( <i>z</i> = 1.12, <i>p</i> > .05)  | 24; <i>z</i> (75) = -1.51, <i>p</i> > .05  | 1.31                                | 1.54                                 | 18%     | 24 ( <i>F</i> <sub>117,75</sub> = 1.31, <i>p</i> > .05) | 14.2              | 5.6       | 9          |
| 25                 | 164        | 66            | 25 ( <i>z</i> = 0.41, <i>p</i> > .05)  | 25; <i>z</i> (57) = -0.59, <i>p</i> > .05  | 1.28                                | 1.37                                 | 7%      | 25 ( <i>F</i> <sub>82,57</sub> = 1.22, <i>p</i> > .05)  | 0.7               | 5.3       | -5         |
| 26                 | 74         | 30            | 26 ( <i>z</i> = 1.27, <i>p</i> > .05)  | 26; <i>z</i> (56) = -0.32, <i>p</i> > .05  | 0.97                                | 1.01                                 | 4%      | 26 ( <i>F</i> <sub>56,111</sub> = 1.50, <i>p</i> > .05) | 0.0               | 11.1      | -11        |
| 27                 | 539        | 218           | 27 ( <i>z</i> = 1.83, <i>p</i> > .05)  | 27; <i>z</i> (31) = -2.00, <i>p</i> < .05  | 0.92                                | 1.49                                 | 62%     | 27 ( <i>F</i> <sub>84,31</sub> = 1.20, <i>p</i> > .05)  | 30.0              | 20.0      | 10         |
| 28                 | 169        | 68            | 28 ( <i>z</i> = 4.46, <i>p</i> < .01)  | 28; <i>z</i> (31) = -4.93, <i>p</i> < .01  | 1.05                                | 1.87                                 | 78%     | 28 ( <i>F</i> <sub>87,31</sub> = 1.47, <i>p</i> > .05)  | 0.0               | 10.0      | -10        |
| 29                 | 135        | 55            | 29 ( <i>z</i> = -4.28, <i>p</i> < .01) | 29; <i>z</i> (55) = -4.08, <i>p</i> < .01  | 1.26                                | 1.85                                 | 47%     | 29 ( <i>F</i> <sub>55,61</sub> = 1.55, <i>p</i> > .05)  | 2.0               | 3.0       | -1         |
| 30                 | 59         | 24            | 30 ( <i>z</i> = 4.25, <i>p</i> < .01)  | 30; <i>z</i> (35) = -5.14, <i>p</i> < .01  | 1.19                                | 1.75                                 | 47%     | 30 ( <i>F</i> <sub>110,35</sub> = 2.64, <i>p</i> < .01) | 7.0               | 0.0       | 7          |
| 31                 | 71         | 29            | 31 ( <i>z</i> = 4.55, <i>p</i> < .01)  | 31; <i>z</i> (34) = 5.90, <i>p</i> < .01   | 1.18                                | 0.14                                 | -88%    | 31 ( <i>F</i> <sub>99,34</sub> = 1.88, <i>p</i> > .05)  | 3.0               | 37.0      | -34        |
| 32                 | 15         | 6             | 32 ( <i>z</i> = 6.82, <i>p</i> < .01)  | 32; <i>z</i> (39) = 8.79, <i>p</i> < .01   | 0.46                                | (0.63)                               | <-200%  | 32 ( <i>F</i> <sub>39,103</sub> = 1.32, <i>p</i> > .05) | 9.0               | 64.0      | -55        |
| 33                 | 58         | 23            | 33 ( <i>z</i> = 0.91, <i>p</i> > .05)  | 33; <i>z</i> (63) = -0.68, <i>p</i> > .05  | 0.45                                | 0.54                                 | 20%     | 33 ( <i>F</i> <sub>63,96</sub> = 1.16, <i>p</i> > .05)  | 10.0              | 10.0      | 0          |
| 34                 | 48         | 19            | 34 ( <i>z</i> = -8.75, <i>p</i> < .01) | 34; <i>z</i> (63) = 12.25, <i>p</i> < .01  | 0.45                                | (0.83)                               | <-200%  | 34 ( <i>F</i> <sub>129,63</sub> = 1.91, <i>p</i> < .01) | 10.0              | 90.0      | -80        |
| 35                 | 282        | 114           | 35 ( <i>z</i> = 0.14, <i>p</i> > .05)  | 35; <i>z</i> (84) = 0.08, <i>p</i> > .05   | 1.79                                | 1.78                                 | -1%     | 35 ( <i>F</i> <sub>84,187</sub> = 1.09, <i>p</i> > .05) | 5.3               | 6.2       | -1         |
| 36                 | 213        | 86            | 36 ( <i>z</i> = -3.46, <i>p</i> < .01) | 36; <i>z</i> (48) = -3.94, <i>p</i> < .01  | 1.13                                | 1.79                                 | 58%     | 36 ( <i>F</i> <sub>48,78</sub> = 3.08, <i>p</i> < .01)  | 3.5               | 0.0       | 4          |
| 37                 | 92         | 37            | 37 ( <i>z</i> = -0.58, <i>p</i> > .05) | 37; <i>z</i> (60) = -0.63, <i>p</i> > .05  | 0.74                                | 0.84                                 | 14%     | 37 ( <i>F</i> <sub>60,71</sub> = 1.22, <i>p</i> > .05)  | 4.2               | 6.9       | -3         |
| 38                 | 56         | 23            | 38 ( <i>z</i> = -5.88, <i>p</i> < .01) | 38; <i>z</i> (69) = 6.51, <i>p</i> < .01   | 0.73                                | (0.35)                               | -148%   | 38 ( <i>F</i> <sub>69,98</sub> = 1.04, <i>p</i> > .05)  | 14.4              | 68.7      | -54        |
| 39                 | 42         | 17            | 39 ( <i>z</i> = 1.38, <i>p</i> > .05)  | 39; <i>z</i> (55) = 1.73, <i>p</i> > .05   | 0.07                                | (0.21)                               | <-200%  | 39 ( <i>F</i> <sub>55,58</sub> = 1.60, <i>p</i> > .05)  | 23.3              | 35.8      | -12        |
| 40                 | 4537       | 1833          | 40 ( <i>z</i> = -0.72, <i>p</i> > .05) | 40; <i>z</i> (47) = -0.07, <i>p</i> > .05  | 3.02                                | 3.03                                 | 0%      | 40 ( <i>F</i> <sub>54,47</sub> = 2.13, <i>p</i> < .05)  | 2.0               | 0.0       | 2          |
| 41                 | 4456       | 1800          | 41 ( <i>z</i> = -0.19, <i>p</i> > .05) | 41; <i>z</i> (33) = 0.07, <i>p</i> > .05   | 3.10                                | 3.09                                 | 0%      | 41 ( <i>F</i> <sub>102,33</sub> = 1.24, <i>p</i> > .05) | 2.0               | 0.0       | 2          |
| 42                 | 4436       | 1792          | 42 ( <i>z</i> = -1.87, <i>p</i> > .05) | 42; <i>z</i> (30) = 0.92, <i>p</i> > .05   | 3.19                                | 3.01                                 | -6%     | 42 ( <i>F</i> <sub>38,30</sub> = 2.52, <i>p</i> < .05)  | 9.0               | 0.0       | 9          |
| 43                 | 142        | 57            | 43 ( <i>z</i> = 2.03, <i>p</i> < .05)  | 43; <i>z</i> (47) = -2.73, <i>p</i> < .01  | 1.01                                | 1.44                                 | 43%     | 43 ( <i>F</i> <sub>108,47</sub> = 2.17, <i>p</i> < .05) | 10.0              | 0.0       | 10         |

|    |       |      |                             |                              |        |        |       |                                     |      |      |     |
|----|-------|------|-----------------------------|------------------------------|--------|--------|-------|-------------------------------------|------|------|-----|
| 44 | 109   | 44   | 44 ( $z = -0.24, p > .05$ ) | 44; $z(55) = 0.34, p > .05$  | 0.90   | 0.84   | -7%   | 44 ( $F_{55,107} = 1.16, p > .05$ ) | 10.0 | 20.0 | -10 |
| 45 | 60    | 24   | 45 ( $z = -1.35, p > .05$ ) | 45; $z(54) = 0.95, p > .05$  | 0.55   | 0.38   | -31%  | 45 ( $F_{127,54} = 1.17, p > .05$ ) | 30.0 | 40.0 | -10 |
| 46 | 344   | 139  | 46 ( $z = 0.50, p > .05$ )  | 46; $z(38) = 0.65, p > .05$  | 1.81   | 1.68   | -7%   | 46 ( $F_{39,38} = 1.14, p > .05$ )  | 3.0  | 3.0  | 0   |
| 47 | 310   | 125  | 47 ( $z = -0.76, p > .05$ ) | 47; $z(36) = 1.32, p > .05$  | 1.84   | 1.54   | -16%  | 47 ( $F_{36,38} = 1.78, p > .05$ )  | 3.0  | 8.0  | -5  |
| 48 | 155   | 63   | 48 ( $z = -0.58, p > .05$ ) | 48; $z(30) = -0.79, p > .05$ | 1.52   | 1.66   | 9%    | 48 ( $F_{30,33} = 2.07, p < .05$ )  | 3.0  | 0.0  | 3   |
| 49 | 93    | 38   | 49 ( $z = -1.28, p > .05$ ) | 49; $z(29) = -1.41, p > .05$ | 1.28   | 1.51   | 18%   | 49 ( $F_{29,37} = 1.86, p > .05$ )  | 3.0  | 0.0  | 3   |
| 50 | 360   | 145  | 50 ( $z = 0.65, p > .05$ )  | 50; $z(51) = -0.83, p > .05$ | 1.31   | 1.51   | 15%   | 50 ( $F_{103,51} = 1.20, p > .05$ ) | 27.0 | 21.0 | 6   |
| 51 | 351   | 142  | 51 ( $z = -1.43, p > .05$ ) | 51; $z(80) = 3.31, p < .01$  | 1.78   | 1.21   | -32%  | 51 ( $F_{80,145} = 4.48, p < .01$ ) | 3.0  | 14.0 | -11 |
| 52 | 256   | 103  | 52 ( $z = 1.45, p > .05$ )  | 52; $z(80) = -0.43, p > .05$ | 1.64   | 1.70   | 4%    | 52 ( $F_{80,113} = 1.50, p > .05$ ) | 2.0  | 9.0  | -7  |
| 53 | 179   | 72   | 53 ( $z = -1.38, p > .05$ ) | 53; $z(46) = -0.75, p > .05$ | 1.33   | 1.45   | 9%    | 53 ( $F_{73,46} = 1.70, p > .05$ )  | 0.0  | 0.0  | 0   |
| 54 | 78    | 32   | 54 ( $z = -2.84, p < .01$ ) | 54; $z(51) = -2.62, p < .01$ | 0.55   | 0.91   | 65%   | 54 ( $F_{51,71} = 1.17, p > .05$ )  | 0.0  | 1.0  | -1  |
| 55 | 486   | 196  | 55 ( $z = -1.94, p > .05$ ) | 55; $z(60) = -1.85, p > .05$ | 1.80   | 2.12   | 18%   | 55 ( $F_{60,65} = 1.23, p > .05$ )  | 2.0  | 3.0  | -1  |
| 56 | 449   | 181  | 56 ( $z = -1.51, p > .05$ ) | 56; $z(60) = -0.73, p > .05$ | 1.76   | 1.89   | 7%    | 56 ( $F_{73,60} = 1.60, p > .05$ )  | 0.0  | 3.0  | -3  |
| 57 | 97    | 39   | 57 ( $z = 1.85, p > .05$ )  | 57; $z(47) = 2.93, p < .01$  | 1.75   | 1.31   | -25%  | 57 ( $F_{76,47} = 2.92, p < .01$ )  | 0.0  | 6.0  | -6  |
| 58 | 200   | 81   | 58 ( $z = -1.17, p > .05$ ) | 58; $t(60) = -1.51, p > .05$ | 1.33   | 1.72   | 30%   | 58 ( $F_{22,38} = 1.89, p > .05$ )  | 9.0  | 0.0  | 9   |
| 59 | 133   | 54   | 59 ( $z = 3.37, p < .01$ )  | 59; $z(39) = -4.61, p < .01$ | 0.62   | 1.64   | 165%  | 59 ( $F_{40,39} = 5.39, p < .01$ )  | 9.0  | 0.0  | 9   |
| 60 | 57    | 23   | 60 ( $z = -0.24, p > .05$ ) | 60; $z(29) = -0.04, p > .05$ | 0.18   | 0.19   | 6%    | 60 ( $F_{44,29} = 1.67, p > .05$ )  | 13.0 | 49.0 | -36 |
| 61 | 125   | 51   | 61 ( $z = 0.59, p > .05$ )  | 61; $z(74) = 0.40, p > .05$  | 0.46   | 0.38   | -17%  | 61 ( $F_{74,141} = 1.11, p > .05$ ) | 46.6 | 47.8 | -1  |
| 62 | 113   | 46   | 62 ( $z = 2.08, p < .05$ )  | 62; $z(48) = 1.79, p > .05$  | 1.50   | 1.21   | -19%  | 62 ( $F_{80,48} = 1.22, p > .05$ )  | 0.0  | 4.6  | -5  |
| 63 | 63    | 25   | 63 ( $z = 1.68, p > .05$ )  | 63; $z(44) = 0.41, p > .05$  | 1.38   | 1.33   | -4%   | 63 ( $F_{44,105} = 1.81, p < .05$ ) | 1.4  | 0.0  | 1   |
| 64 | 27    | 11   | 64 ( $z = 2.90, p < .01$ )  | 64; $t(28) = 3.64, p < .01$  | 0.86   | 0.19   | -78%  | 64 ( $F_{69,28} = 2.42, p < .05$ )  | 0.0  | 48.6 | -49 |
| 65 | 69    | 28   | 65 ( $z = -0.81, p > .05$ ) | 65; $z(31) = -1.23, p > .05$ | 0.41   | 0.71   | 73%   | 65 ( $F_{31,62} = 2.68, p < .01$ )  | 40.0 | 0.0  | 40  |
| 66 | 19    | 8    | 66 ( $z = 2.61, p < .01$ )  | 66; $z(38) = 3.93, p < .01$  | (0.49) | (1.00) | -104% |                                     |      |      |     |
| 67 | 69    | 28   | 67 ( $z = -4.79, p < .01$ ) | 67; $z(94) = -5.27, p < .01$ | (0.09) | 0.76   | >200% | 67 ( $F_{126,94} = 1.03, p > .05$ ) | 59.1 | 25.4 | 34  |
| 68 | 56    | 23   | 68 ( $z = 5.52, p < .01$ )  | 68; $t(84) = 8.28, p < .01$  | 1.25   | (0.59) | -147% | 68 ( $F_{28,56} = 1.43, p > .05$ )  | 89.0 | 93.0 | -4  |
| 69 | 43    | 17   | 69 ( $z = 3.39, p < .01$ )  | 69; $t(68) = 3.43, p < .01$  | 1.26   | 0.56   | -56%  | 69 ( $F_{50,18} = 1.00, p > .05$ )  | 11.0 | 69.0 | -58 |
| 70 | 17262 | 6974 | 70 ( $z = 0.85, p > .05$ )  | 70; $z(45) = -1.62, p > .05$ | 3.22   | 3.48   | 8%    | 70 ( $F_{59,45} = 2.49, p < .01$ )  | 0.0  | 0.0  | 0   |
| 71 | 16850 | 6807 | 71 ( $z = -0.80, p > .05$ ) | 71; $z(60) = 0.23, p > .05$  | 3.41   | 3.38   | -1%   | 71 ( $F_{99,60} = 1.45, p > .05$ )  | 0.0  | 0.0  | 0   |
| 72 | 16597 | 6705 | 72 ( $z = -0.67, p > .05$ ) | 72; $z(61) = 0.14, p > .05$  | 3.42   | 3.40   | -1%   | 72 ( $F_{76,61} = 1.60, p > .05$ )  | 0.0  | 0.0  | 0   |
| 73 | 16477 | 6657 | 73 ( $z = 0.40, p > .05$ )  | 73; $z(52) = -0.31, p > .05$ | 3.22   | 3.27   | 2%    | 73 ( $F_{52,53} = 2.57, p < .01$ )  | 0.0  | 0.0  | 0   |
| 74 | 14422 | 5826 | 74 ( $z = 3.23, p < .01$ )  | 74; $z(44) = -4.95, p < .01$ | 2.76   | 3.39   | 23%   | 74 ( $F_{113,44} = 3.58, p < .01$ ) | 0.0  | 0.0  | 0   |
| 75 | 14314 | 5783 | 75 ( $z = -0.52, p > .05$ ) | 75; $z(59) = -0.25, p > .05$ | 3.32   | 3.35   | 1%    | 75 ( $F_{136,59} = 1.91, p < .05$ ) | 0.0  | 0.0  | 0   |
| 76 | 13604 | 5496 | 76 ( $z = -1.18, p > .05$ ) | 76; $z(59) = 0.62, p > .05$  | 3.44   | 3.37   | -2%   | 76 ( $F_{117,54} = 1.36, p > .05$ ) | 0.0  | 0.0  | 0   |
| 77 | 13522 | 5463 | 77 ( $z = -0.90, p > .05$ ) | 77; $z(54) = -0.09, p > .05$ | 3.31   | 3.32   | 0%    | 77 ( $F_{116,54} = 2.35, p < .01$ ) |      |      |     |
| 78 | 13486 | 5448 | 78 ( $z = 1.54, p > .05$ )  | 78; $z(52) = 0.68, p > .05$  | 3.36   | 3.26   | -3%   | 78 ( $F_{52,58} = 2.43, p < .01$ )  |      |      |     |
| 79 | 8290  | 3349 | 79 ( $z = -4.17, p < .01$ ) | 79; $z(64) = 4.09, p < .01$  | 3.59   | 3.11   | -13%  | 79 ( $F_{64,83} = 1.22, p > .05$ )  |      |      |     |
| 80 | 78    | 32   | 80 ( $z = -1.48, p > .05$ ) | 80; $z(87) = -1.53, p > .05$ | (0.04) | 0.23   | >200% | 80 ( $F_{87,98} = 1.26, p > .05$ )  | 72.9 | 60.4 | 13  |
| 81 | 54    | 22   | 81 ( $z = -5.92, p < .01$ ) | 81; $z(93) = -7.34, p < .01$ | 0.27   | 1.19   | >200% | 81 ( $F_{93,123} = 3.79, p < .01$ ) | 14.4 | 0.0  | 14  |
| 82 | 85    | 34   | 82 ( $z = -4.06, p < .01$ ) | 82; $t(21) = 6.71, p < .01$  | 1.47   | (0.33) | -122% | 82 ( $F_{21,26} = 4.61, p < .01$ )  | 0.0  | 47.0 | -47 |
| 83 | 68    | 27   | 83 ( $z = 3.26, p < .01$ )  | 83; $t(26) = 4.40, p < .01$  | 1.27   | 0.33   | -74%  | 83 ( $F_{35,26} = 3.72, p < .01$ )  | 0.0  | 22.0 | -22 |
| 84 | 40    | 16   | 84 ( $z = 0.53, p > .05$ )  | 84; $z(35) = -0.32, p > .05$ | 0.71   | 0.75   | 6%    | 84 ( $F_{50,35} = 1.15, p > .05$ )  | 0.0  | 0.0  | 0   |
| 85 | 4     | 2    | 85 ( $z = 2.23, p < .05$ )  | 85; $t(51) = 2.50, p < .01$  | (0.45) | (0.86) | -91%  | 85 ( $F_{15,36} = 1.87, p > .05$ )  | 12.0 | 78.0 | -66 |
| 86 | 349   | 141  | 86 ( $z = 1.97, p < .05$ )  | 86; $z(42) = -0.94, p > .05$ | 1.31   | 1.55   | 18%   | 86 ( $F_{42,85} = 1.64, p > .05$ )  | 6.6  | 23.8 | -17 |
| 87 | 285   | 115  | 87 ( $z = -0.28, p > .05$ ) | 87; $z(40) = 0.94, p > .05$  | 1.58   | 1.36   | -14%  | 87 ( $F_{40,152} = 1.81, p < .05$ ) | 0.0  | 23.8 | -24 |
| 88 | 153   | 62   | 88 ( $z = 0.56, p > .05$ )  | 88; $z(69) = -0.63, p > .05$ | 0.54   | 0.67   | 24%   | 88 ( $F_{69,83} = 1.07, p > .05$ )  | 24.6 | 52.6 | -28 |
