# Supplementary material
Source: MDPI journal article supplement (https://www.mdpi.com/2306-5338/6/3/67)
Supplement: s1 [file s1]

**Table S3:** F test results to determine if the variances of pre-mine and post-mine log10 transformed discharge populations are different and the null hypothesis, H<sub>0</sub>, can be rejected. Three effects to variance are observed; 1.) decrease suggests the post-mine log10 discharge variance is less than the pre-mine log10 discharge variance, 2.) increase suggests the post-mine log10 discharge variance is greater than the pre-mine log10 discharge variance and 3.) no change. Data compared to published critical values of F distribution at alpha = 0.05 and 0.01 and fit to a two-tailed test.

| Site ID | s1   | n1  | s2   | n2  | F    | critical value (α/2) |      | critical value (α/2) |      | Decision                          | Effect to Variance |
|---------|------|-----|------|-----|------|----------------------|------|----------------------|------|-----------------------------------|--------------------|
| 1       | 0.85 | 62  | 0.8  | 90  | 1.13 | 0.025                | 1.67 | 0.005                | 1.96 | accept H <sub>0</sub>             | No change          |
| 2       | 1.27 | 73  | 1.33 | 79  | 1.10 | 0.025                | 1.67 | 0.005                | 1.96 | accept H <sub>0</sub>             | No change          |
| 3       | 1.05 | 40  | 1    | 80  | 1.10 | 0.025                | 1.82 | 0.005                | 2.19 | accept H <sub>0</sub>             | No change          |
| 4       | 1.22 | 71  | 0.66 | 93  | 3.42 | 0.025                | 1.67 | 0.005                | 1.96 | reject H <sub>0</sub> at α = 0.01 | Decrease           |
| 5       | 1.17 | 67  | 1.45 | 94  | 1.54 | 0.025                | 1.67 | 0.005                | 1.96 | accept H <sub>0</sub>             | No change          |
| 6       | 0.91 | 116 | 1.01 | 117 | 1.23 | 0.025                | 1.67 | 0.005                | 1.96 | accept H <sub>0</sub>             | No change          |
| 7       | 1.05 | 43  | 1.38 | 35  | 1.73 | 0.025                | 1.94 | 0.005                | 2.40 | accept H <sub>0</sub>             | No change          |
| 8       | 0.75 | 44  | 0.92 | 38  | 1.50 | 0.025                | 1.94 | 0.005                | 2.40 | accept H <sub>0</sub>             | No change          |
| 9       | 0.36 | 10  | 0.4  | 15  | 1.23 | 0.025                | 3.87 | 0.005                | 6.23 | accept H <sub>0</sub>             | No change          |
| 10      | 1.3  | 51  | 1.41 | 109 | 1.18 | 0.025                | 1.80 | 0.005                | 2.18 | accept H <sub>0</sub>             | No change          |
| 11      | 1.08 | 62  | 1.34 | 114 | 1.54 | 0.025                | 1.67 | 0.005                | 1.96 | accept H <sub>0</sub>             | No change          |
| 12      | 1.05 | 48  | 1.11 | 115 | 1.12 | 0.025                | 1.80 | 0.005                | 2.18 | accept H <sub>0</sub>             | No change          |
| 13      | 0.83 | 45  | 1.01 | 111 | 1.48 | 0.025                | 1.80 | 0.005                | 2.18 | accept H <sub>0</sub>             | No change          |
| 14      | 1.93 | 82  | 1.24 | 91  | 2.42 | 0.025                | 1.67 | 0.005                | 1.96 | reject H <sub>0</sub> at α = 0.01 | Decrease           |
| 15      | 1.39 | 82  | 1.01 | 105 | 1.89 | 0.025                | 1.67 | 0.005                | 1.96 | reject H <sub>0</sub> at α = 0.05 | Decrease           |
| 16      | 1.08 | 147 | 0.55 | 31  | 3.86 | 0.025                | 1.87 | 0.005                | 2.30 | reject H <sub>0</sub> at α = 0.01 | Decrease           |
| 17      | 0.98 | 101 | 0.63 | 39  | 2.42 | 0.025                | 1.94 | 0.005                | 2.42 | reject H <sub>0</sub> at α = 0.01 | Decrease           |
| 18      | 1.5  | 131 | 0.67 | 36  | 5.01 | 0.025                | 1.87 | 0.005                | 2.30 | reject H <sub>0</sub> at α = 0.01 | Decrease           |
| 19      | 1.37 | 114 | 1.01 | 71  | 1.84 | 0.025                | 1.67 | 0.005                | 1.96 | reject H <sub>0</sub> at α = 0.05 | Decrease           |
| 20      | 1.14 | 89  | 0.63 | 66  | 3.27 | 0.025                | 1.67 | 0.005                | 1.96 | reject H <sub>0</sub> at α = 0.01 | Decrease           |
| 21      | 0.6  | 62  | 0.48 | 68  | 1.56 | 0.025                | 1.67 | 0.005                | 1.96 | accept H <sub>0</sub>             | No change          |
| 22      | 1.09 | 48  | 0.62 | 67  | 3.09 | 0.025                | 1.74 | 0.005                | 2.08 | reject H <sub>0</sub> at α = 0.01 | Decrease           |
| 23      | 1.27 | 257 | 0.51 | 72  | 6.20 | 0.025                | 1.58 | 0.005                | 1.83 | reject H <sub>0</sub> at α = 0.01 | Decrease           |
| 24      | 1.12 | 118 | 0.98 | 76  | 1.31 | 0.025                | 1.67 | 0.005                | 1.96 | accept H <sub>0</sub>             | No change          |
| 25      | 0.95 | 83  | 0.86 | 58  | 1.22 | 0.025                | 1.80 | 0.005                | 2.18 | accept H <sub>0</sub>             | No change          |
| 26      | 0.67 | 112 | 0.82 | 57  | 1.50 | 0.025                | 1.74 | 0.005                | 2.08 | accept H <sub>0</sub>             | No change          |
| 27      | 1.47 | 85  | 1.34 | 32  | 1.20 | 0.025                | 1.94 | 0.005                | 2.42 | accept H <sub>0</sub>             | No change          |
| 28      | 0.92 | 88  | 0.76 | 32  | 1.47 | 0.025                | 1.94 | 0.005                | 2.42 | accept H <sub>0</sub>             | No change          |
| 29      | 0.86 | 56  | 0.69 | 62  | 1.55 | 0.025                | 1.74 | 0.005                | 2.08 | accept H <sub>0</sub>             | No change          |
| 30      | 0.78 | 111 | 0.48 | 36  | 2.64 | 0.025                | 1.94 | 0.005                | 2.42 | reject H <sub>0</sub> at α = 0.01 | Decrease           |
| 31      | 0.81 | 35  | 1.11 | 100 | 1.88 | 0.025                | 1.94 | 0.005                | 2.42 | accept H <sub>0</sub>             | No change          |
| 32      | 0.69 | 40  | 0.6  | 104 | 1.32 | 0.025                | 1.82 | 0.005                | 2.19 | accept H <sub>0</sub>             | No change          |
| 33      | 0.79 | 97  | 0.85 | 64  | 1.16 | 0.025                | 1.67 | 0.005                | 1.96 | accept H <sub>0</sub>             | No change          |
| 34      | 0.83 | 130 | 0.6  | 64  | 1.91 | 0.025                | 1.58 | 0.005                | 1.83 | reject H <sub>0</sub> at α = 0.01 | Decrease           |
| 35      | 0.96 | 188 | 1    | 85  | 1.09 | 0.025                | 1.53 | 0.005                | 1.75 | accept H <sub>0</sub>             | No change          |
| 36      | 1.07 | 49  | 0.61 | 79  | 3.08 | 0.025                | 1.74 | 0.005                | 2.08 | reject H <sub>0</sub> at α = 0.01 | Decrease           |
| 37      | 0.95 | 61  | 0.86 | 72  | 1.22 | 0.025                | 1.67 | 0.005                | 1.96 | accept H <sub>0</sub>             | No change          |
| 38      | 1.05 | 99  | 1.07 | 70  | 1.04 | 0.025                | 1.67 | 0.005                | 1.96 | accept H <sub>0</sub>             | No change          |
| 39      | 0.96 | 56  | 0.76 | 59  | 1.60 | 0.025                | 1.88 | 0.005                | 2.30 | accept H <sub>0</sub>             | No change          |
| 40      | 0.92 | 55  | 0.63 | 48  | 2.13 | 0.025                | 1.88 | 0.005                | 2.30 | reject H <sub>0</sub> at α = 0.05 | Decrease           |
| 41      | 0.79 | 103 | 0.71 | 34  | 1.24 | 0.025                | 1.94 | 0.005                | 2.42 | accept H <sub>0</sub>             | No change          |
| 42      | 1    | 39  | 0.63 | 31  | 2.52 | 0.025                | 2.07 | 0.005                | 2.63 | reject H <sub>0</sub> at α = 0.05 | Decrease           |
| 43      | 1.15 | 109 | 0.78 | 48  | 2.17 | 0.025                | 1.80 | 0.005                | 2.18 | reject H <sub>0</sub> at α = 0.05 | Decrease           |
| 44      | 1.03 | 108 | 1.11 | 56  | 1.16 | 0.025                | 1.74 | 0.005                | 2.08 | accept H <sub>0</sub>             | No change          |
| 45      | 1.17 | 128 | 1.08 | 55  | 1.17 | 0.025                | 1.72 | 0.005                | 2.06 | accept H <sub>0</sub>             | No change          |
| 46      | 0.86 | 39  | 0.92 | 40  | 1.14 | 0.025                | 2.07 | 0.005                | 2.63 | accept H <sub>0</sub>             | No change          |
| 47      | 0.84 | 39  | 1.12 | 37  | 1.78 | 0.025                | 2.07 | 0.005                | 2.63 | accept H <sub>0</sub>             | No change          |
| 48      | 0.82 | 31  | 0.57 | 34  | 2.07 | 0.025                | 2.07 | 0.005                | 2.63 | reject H <sub>0</sub> at α = 0.05 | Decrease           |
| 49      | 0.75 | 30  | 0.55 | 38  | 1.86 | 0.025                | 2.14 | 0.005                | 2.73 | accept H <sub>0</sub>             | No change          |
| 50      | 1.5  | 104 | 1.37 | 52  | 1.20 | 0.025                | 1.80 | 0.005                | 2.18 | accept H <sub>0</sub>             | No change          |
| 51      | 0.69 | 146 | 1.46 | 81  | 4.48 | 0.025                | 1.53 | 0.005                | 1.75 | reject H <sub>0</sub> at α = 0.01 | Increase           |
| 52      | 0.85 | 114 | 1.04 | 81  | 1.50 | 0.025                | 1.67 | 0.005                | 1.96 | accept H <sub>0</sub>             | No change          |
| 53      | 0.76 | 47  | 0.99 | 74  | 1.70 | 0.025                | 1.80 | 0.005                | 1.96 | accept H <sub>0</sub>             | No change          |
| 54      | 0.78 | 52  | 0.72 | 72  | 1.17 | 0.025                | 1.74 | 0.005                | 2.08 | accept H <sub>0</sub>             | No change          |
| 55      | 1.02 | 61  | 0.92 | 66  | 1.23 | 0.025                | 1.67 | 0.005                | 1.96 | accept H <sub>0</sub>             | No change          |
| 56      | 0.91 | 61  | 1.15 | 74  | 1.60 | 0.025                | 1.67 | 0.005                | 1.96 | accept H <sub>0</sub>             | No change          |
| 57      | 0.62 | 48  | 1.06 | 77  | 2.92 | 0.025                | 1.80 | 0.005                | 2.18 | reject H <sub>0</sub> at α = 0.01 | Increase           |
| 58      | 1.17 | 23  | 0.85 | 39  | 1.89 | 0.025                | 2.20 | 0.005                | 2.82 | accept H <sub>0</sub>             | No change          |
| 59      | 1.3  | 41  | 0.56 | 40  | 5.39 | 0.025                | 2.01 | 0.005                | 2.52 | reject H <sub>0</sub> at α = 0.01 | Decrease           |
| 60      | 0.99 | 30  | 1.28 | 45  | 1.67 | 0.025                | 2.03 | 0.005                | 2.56 | accept H <sub>0</sub>             | No change          |
| 61      | 1.43 | 75  | 1.36 | 142 | 1.11 | 0.025                | 1.53 | 0.005                | 1.75 | accept H <sub>0</sub>             | No change          |
| 62      | 0.86 | 49  | 0.95 | 81  | 1.22 | 0.025                | 1.80 | 0.005                | 2.18 | accept H <sub>0</sub>             | No change          |
| 63      | 0.74 | 45  | 0.55 | 106 | 1.81 | 0.025                | 1.74 | 0.005                | 2.08 | reject H <sub>0</sub> at α = 0.05 | Decrease           |
| 64      | 0.7  | 29  | 1.09 | 70  | 2.42 | 0.025                | 1.96 | 0.005                | 2.45 | reject H <sub>0</sub> at α = 0.05 | Increase           |
| 65      | 1.26 | 32  | 0.77 | 63  | 2.68 | 0.025                | 1.82 | 0.005                | 2.19 | reject H <sub>0</sub> at α = 0.01 | Decrease           |
| 66      | 0.81 | 39  | 0    | 64  |      |                      |      |                      |      |                                   | Decrease           |
| 67      | 1.18 | 95  | 1.2  | 127 | 1.03 | 0.025                | 1.58 | 0.005                | 1.83 | accept H <sub>0</sub>             | No change          |
| 68      | 1.09 | 29  | 0.91 | 57  | 1.43 | 0.025                | 2.01 | 0.005                | 2.50 | accept H <sub>0</sub>             | No change          |
| 69      | 0.76 | 19  | 0.76 | 51  | 1.00 | 0.025                | 2.33 | 0.005                | 3.11 | accept H <sub>0</sub>             | No change          |
| 70      | 1.01 | 60  | 0.64 | 46  | 2.49 | 0.025                | 1.88 | 0.005                | 2.30 | reject H <sub>0</sub> at α = 0.01 | Decrease           |
| 71      | 0.88 | 100 | 0.73 | 61  | 1.45 | 0.025                | 1.67 | 0.005                | 1.96 | accept H <sub>0</sub>             | No change          |
| 72      | 0.91 | 77  | 0.72 | 62  | 1.60 | 0.025                | 1.67 | 0.005                | 1.96 | accept H <sub>0</sub>             | No change          |
| 73      | 1.01 | 53  | 0.63 | 54  | 2.57 | 0.025                | 1.88 | 0.005                | 2.30 | reject H <sub>0</sub> at α = 0.01 | Decrease           |
| 74      | 1.04 | 114 | 0.55 | 45  | 3.58 | 0.025                | 1.80 | 0.005                | 2.18 | reject H <sub>0</sub> at α = 0.01 | Decrease           |
| 75      | 0.94 | 137 | 0.68 | 60  | 1.91 | 0.025                | 1.72 | 0.005                | 2.06 | reject H <sub>0</sub> at α = 0.05 | Decrease           |
| 76      | 0.78 | 118 | 0.67 | 60  | 1.36 | 0.025                | 1.80 | 0.005                | 2.18 | accept H <sub>0</sub>             | No change          |
| 77      | 0.92 | 117 | 0.6  | 55  | 2.35 | 0.025                | 1.80 | 0.005                | 2.18 | reject H <sub>0</sub> at α = 0.01 | Decrease           |
| 78      | 0.92 | 53  | 0.59 | 59  | 2.43 | 0.025                | 1.88 | 0.005                | 2.30 | reject H <sub>0</sub> at α = 0.05 | Decrease           |
| 79      | 0.67 | 84  | 0.74 | 65  | 1.22 | 0.025                | 1.67 | 0.005                | 1.96 | accept H <sub>0</sub>             | No change          |
| 80      | 1.27 | 88  | 1.13 | 99  | 1.26 | 0.025                | 1.67 | 0.005                | 1.96 | accept H <sub>0</sub>             | No change          |
| 81      | 1.11 | 94  | 0.57 | 124 | 3.79 | 0.025                | 1.53 | 0.005                | 1.75 | reject H <sub>0</sub> at α = 0.01 | Decrease           |
| 82      | 0.54 | 27  | 1.16 | 22  | 4.61 | 0.025                | 2.25 | 0.005                | 2.93 | reject H <sub>0</sub> at α = 0.01 | Increase           |
| 83      | 0.57 | 27  | 1.1  | 36  | 3.72 | 0.025                | 2.13 | 0.005                | 2.73 | reject H <sub>0</sub> at α = 0.01 | Increase           |
| 84      | 0.6  | 51  | 0.56 | 36  | 1.15 | 0.025                | 2.01 | 0.005                | 2.52 | accept H <sub>0</sub>             | No change          |
| 85      | 0.67 | 16  | 0.49 | 37  | 1.87 | 0.025                | 2.31 | 0.005                | 3.01 | accept H <sub>0</sub>             | No change          |
| 86      | 1.14 | 86  | 1.46 | 43  | 1.64 | 0.025                | 1.74 | 0.005                | 2.08 | accept H <sub>0</sub>             | No change          |
| 87      | 1.04 | 153 | 1.4  | 41  | 1.81 | 0.025                | 1.61 | 0.005                | 1.87 | reject H <sub>0</sub> at α = 0.05 | Increase           |
| 88      | 1.25 | 84  | 1.29 | 70  | 1.07 | 0.025                | 1.67 | 0.005                | 1.96 | accept H <sub>0</sub>             | No change          |
