# Supplementary material
Source: MDPI journal article supplement (https://www.mdpi.com/2306-5338/6/3/67)
Supplement: s1 [file s1]

**Table S2:** T test results to determine if the means of the pre-mine and post-mine log-transformed discharge populations are different and the null hypothesis,  $H_0$ , can be rejected. Negative variance of the difference,  $x_1 - x_2$ , indicates a statistically significant increase in the post-mine geometric mean and positive variance of the difference indicates a statistically significant decrease in the post-mine geometric mean. Data compared to published critical values of  $t$  at  $\alpha = 0.05$  and fit to a two-tailed test.

| Site ID | F Test                          | x1     | s1   | n1 | x2     | s2   | n2 | $\mu_1 - \mu_2$ | critical value ( $\alpha/2$ ) |      | t      | p-value | 95% Confidence Interval |        | Decision                                  |
|---------|---------------------------------|--------|------|----|--------|------|----|-----------------|-------------------------------|------|--------|---------|-------------------------|--------|-------------------------------------------|
| 58      | accept $H_0$                    | 1.33   | 1.17 | 23 | 1.72   | 0.85 | 39 | 0               | 0.025                         | 1.96 | (1.51) | >0.10   | (0.89)                  | 0.11   | accept $H_0$                              |
| 9       | accept $H_0$                    | 0.98   | 0.36 | 10 | 1.33   | 0.40 | 15 | 0               | 0.025                         | 2.07 | (2.23) | <0.01   | (0.68)                  | (0.02) | reject $H_0$ ; increase to geometric mean |
| 82      | reject $H_0$ at $\alpha = 0.01$ | 1.47   | 0.54 | 27 | (0.33) | 1.16 | 22 | 0               | 0.025                         | 2.08 | 6.71   | <0.01   | 1.28                    | 2.32   | reject $H_0$ ; decrease to geometric mean |
| 83      | reject $H_0$ at $\alpha = 0.01$ | 1.27   | 0.57 | 27 | 0.33   | 1.10 | 36 | 0               | 0.025                         | 2.06 | 4.40   | <0.01   | 0.46                    | 1.42   | reject $H_0$ ; decrease to geometric mean |
| 85      | accept $H_0$                    | (0.45) | 0.67 | 16 | (0.86) | 0.49 | 37 | 0               | 0.025                         | 1.96 | 2.50   | <0.01   | 0.09                    | 0.73   | reject $H_0$ ; decrease to geometric mean |
| 64      | reject $H_0$ at $\alpha = 0.05$ | 0.86   | 0.70 | 29 | 0.19   | 1.09 | 70 | 0               | 0.025                         | 2.05 | 3.64   | <0.01   | 0.22                    | 1.12   | reject $H_0$ ; decrease to geometric mean |
| 68      | accept $H_0$                    | 1.25   | 1.09 | 29 | (0.59) | 0.91 | 57 | 0               | 0.025                         | 1.96 | 8.28   | <0.01   | 1.40                    | 2.28   | reject $H_0$ ; decrease to geometric mean |
| 69      | accept $H_0$                    | 1.26   | 0.76 | 19 | 0.56   | 0.76 | 51 | 0               | 0.025                         | 1.96 | 3.43   | <0.01   | 0.30                    | 1.10   | reject $H_0$ ; decrease to geometric mean |
