# Supplementary material
Source: MDPI journal article supplement (https://www.mdpi.com/2306-5338/6/3/67)
Supplement: s1 [file s1]

**Table S4:** Wilcoxon rank sum test results to determine if the pre-mine and post-mine distributions are stochastically different and the null hypothesis, H<sub>0</sub>, can be rejected. Data compared to published critical values of z at alpha = 0.05 and fit to a two-tailed test.

| Site ID | n1  | n2  | R       | $\mu_R$ | $\sigma_R$ | z     | critical value ( $\alpha/2$ ) |       | p-value | Decision                                 | Effect to Distribution |
|---------|-----|-----|---------|---------|------------|-------|-------------------------------|-------|---------|------------------------------------------|------------------------|
| 1       | 62  | 90  | 4212.5  | 4743.0  | 266.7      | -1.99 | 0.025                         | -1.96 | 0.0466  | reject H <sub>0</sub> at $\alpha$ = 0.05 | positive shift         |
| 2       | 73  | 79  | 5525.5  | 5584.5  | 271.2      | -0.22 | 0.025                         | -1.96 | 0.8258  | accept H <sub>0</sub>                    | no change              |
| 3       | 40  | 80  | 2262.0  | 2420.0  | 179.6      | -0.88 | 0.025                         | -1.96 | 0.3788  | accept H <sub>0</sub>                    | no change              |
| 4       | 71  | 93  | 3979.0  | 5857.5  | 301.3      | -6.23 | 0.025                         | -1.96 | <.01    | reject H <sub>0</sub> at $\alpha$ = 0.01 | positive shift         |
| 5       | 67  | 94  | 6367.0  | 5427.0  | 291.6      | 3.22  | 0.025                         | -1.96 | <.01    | reject H <sub>0</sub> at $\alpha$ = 0.01 | negative shift         |
| 6       | 116 | 117 | 13839.0 | 13572.0 | 514.4      | 0.52  | 0.025                         | -1.96 | 0.6030  | accept H <sub>0</sub>                    | no change              |
| 7       | 43  | 35  | 1208.0  | 1382.5  | 99.5       | -1.75 | 0.025                         | 1.96  | 0.0802  | accept H <sub>0</sub>                    | no change              |
| 8       | 44  | 38  | 1731.5  | 1577.0  | 107.5      | 1.44  | 0.025                         | 1.96  | 0.1498  | accept H <sub>0</sub>                    | no change              |
| 9       | 10  | 15  | 89.5    | 130.0   | 18.0       | -2.25 | 0.025                         | -1.96 | 0.0244  | reject H <sub>0</sub> at $\alpha$ = 0.05 | positive shift         |
| 10      | 51  | 109 | 5052.0  | 4105.5  | 273.1      | 3.47  | 0.025                         | -1.96 | <.01    | reject H <sub>0</sub> at $\alpha$ = 0.01 | negative shift         |
| 11      | 62  | 114 | 6134.5  | 5487.0  | 322.9      | 2.01  | 0.025                         | -1.96 | 0.0444  | reject H <sub>0</sub> at $\alpha$ = 0.05 | negative shift         |
| 12      | 48  | 115 | 4414.5  | 3936.0  | 274.7      | 1.74  | 0.025                         | -1.96 | 0.0818  | accept H <sub>0</sub>                    | no change              |
| 13      | 45  | 111 | 4470.5  | 3532.5  | 255.6      | 3.67  | 0.025                         | -1.96 | <.01    | reject H <sub>0</sub> at $\alpha$ = 0.01 | negative shift         |
| 14      | 82  | 91  | 5341.0  | 7134.0  | 328.9      | -5.45 | 0.025                         | -1.96 | <.01    | reject H <sub>0</sub> at $\alpha$ = 0.01 | positive shift         |
| 15      | 82  | 105 | 5289.5  | 7708.0  | 367.3      | -6.58 | 0.025                         | -1.96 | <.01    | reject H <sub>0</sub> at $\alpha$ = 0.01 | positive shift         |
| 16      | 147 | 31  | 3683.5  | 2774.5  | 260.7      | 3.49  | 0.025                         | 1.96  | <.01    | reject H <sub>0</sub> at $\alpha$ = 0.01 | positive shift         |
| 17      | 101 | 39  | 3704.0  | 2749.5  | 215.1      | 4.44  | 0.025                         | 1.96  | <.01    | reject H <sub>0</sub> at $\alpha$ = 0.01 | positive shift         |
| 18      | 131 | 36  | 3322.0  | 3024.0  | 257.0      | 1.16  | 0.025                         | 1.96  | 0.2460  | accept H <sub>0</sub>                    | no change              |
| 19      | 114 | 71  | 8561.0  | 6603.0  | 354.2      | 5.53  | 0.025                         | 1.96  | <.01    | reject H <sub>0</sub> at $\alpha$ = 0.01 | positive shift         |
| 20      | 89  | 66  | 5632.5  | 5148.0  | 276.3      | 1.75  | 0.025                         | 1.96  | 0.0802  | accept H <sub>0</sub>                    | no change              |
| 21      | 62  | 68  | 3117.0  | 4061.0  | 214.5      | -4.40 | 0.025                         | -1.96 | <.01    | reject H <sub>0</sub> at $\alpha$ = 0.01 | positive shift         |
| 22      | 48  | 67  | 3547.0  | 2784.0  | 176.3      | 4.33  | 0.025                         | -1.96 | <.01    | reject H <sub>0</sub> at $\alpha$ = 0.01 | negative shift         |
| 23      | 257 | 72  | 17175.0 | 11880.0 | 713.3      | 7.42  | 0.025                         | 1.96  | <.01    | reject H <sub>0</sub> at $\alpha$ = 0.01 | positive shift         |
| 24      | 118 | 76  | 7836.0  | 7410.0  | 381.7      | 1.12  | 0.025                         | 1.96  | 0.2628  | accept H <sub>0</sub>                    | no change              |
| 25      | 83  | 58  | 4215.5  | 4118.0  | 238.7      | 0.41  | 0.025                         | 1.96  | 0.6818  | accept H <sub>0</sub>                    | no change              |
| 26      | 112 | 57  | 5227.5  | 4845.0  | 300.7      | 1.27  | 0.025                         | 1.96  | 0.2040  | accept H <sub>0</sub>                    | no change              |
| 27      | 85  | 32  | 2187.0  | 1888.0  | 163.5      | 1.83  | 0.025                         | 1.96  | 0.0672  | accept H <sub>0</sub>                    | no change              |
| 28      | 88  | 32  | 2688.0  | 1936.0  | 168.5      | 4.46  | 0.025                         | 1.96  | <.01    | reject H <sub>0</sub> at $\alpha$ = 0.01 | positive shift         |
| 29      | 56  | 62  | 2538.5  | 3332.0  | 185.6      | -4.28 | 0.025                         | -1.96 | <.01    | reject H <sub>0</sub> at $\alpha$ = 0.01 | positive shift         |
| 30      | 111 | 36  | 3606.5  | 2664.0  | 222.0      | 4.25  | 0.025                         | 1.96  | <.01    | reject H <sub>0</sub> at $\alpha$ = 0.01 | positive shift         |
| 31      | 35  | 100 | 3285.5  | 2380.0  | 199.2      | 4.55  | 0.025                         | -1.96 | <.01    | reject H <sub>0</sub> at $\alpha$ = 0.01 | negative shift         |
| 32      | 40  | 104 | 4428.0  | 2900.0  | 224.2      | 6.82  | 0.025                         | -1.96 | <.01    | reject H <sub>0</sub> at $\alpha$ = 0.01 | negative shift         |
| 33      | 97  | 64  | 5448.0  | 5184.0  | 289.5      | 0.91  | 0.025                         | 1.96  | 0.3628  | accept H <sub>0</sub>                    | no change              |
| 34      | 130 | 64  | 3022.0  | 6240.0  | 367.7      | -8.75 | 0.025                         | 1.96  | <.01    | reject H <sub>0</sub> at $\alpha$ = 0.01 | negative shift         |
| 35      | 188 | 85  | 11728.0 | 11645.0 | 604.1      | 0.14  | 0.025                         | 1.96  | 0.8886  | accept H <sub>0</sub>                    | no change              |
| 36      | 49  | 79  | 2455.0  | 3160.5  | 204.0      | -3.46 | 0.025                         | -1.96 | <.01    | reject H <sub>0</sub> at $\alpha$ = 0.01 | positive shift         |
| 37      | 61  | 72  | 3958.5  | 4087.0  | 221.5      | -0.58 | 0.025                         | -1.96 | 0.5620  | accept H <sub>0</sub>                    | no change              |
| 38      | 99  | 70  | 4107.0  | 5950.0  | 313.3      | -5.88 | 0.025                         | 1.96  | <.01    | reject H <sub>0</sub> at $\alpha$ = 0.01 | negative shift         |
| 39      | 56  | 59  | 3494.0  | 3248.0  | 178.7      | 1.38  | 0.025                         | -1.96 | 0.1676  | accept H <sub>0</sub>                    | no change              |
| 40      | 55  | 48  | 2387.5  | 2496.0  | 151.3      | -0.72 | 0.025                         | 1.96  | 0.4716  | accept H <sub>0</sub>                    | no change              |
| 41      | 103 | 34  | 2308.0  | 2346.0  | 200.7      | -0.19 | 0.025                         | 1.96  | 0.8494  | accept H <sub>0</sub>                    | no change              |
| 42      | 39  | 31  | 942.5   | 1100.5  | 84.6       | -1.87 | 0.025                         | 1.96  | 0.0614  | accept H <sub>0</sub>                    | no change              |
| 43      | 109 | 48  | 4325.5  | 3792.0  | 262.5      | 2.03  | 0.025                         | 1.96  | 0.0424  | reject H <sub>0</sub> at $\alpha$ = 0.05 | positive shift         |
| 44      | 108 | 56  | 4551.0  | 4620.0  | 288.4      | -0.24 | 0.025                         | 1.96  | 0.8104  | accept H <sub>0</sub>                    | no change              |
| 45      | 128 | 55  | 4616.0  | 5060.0  | 328.6      | -1.35 | 0.025                         | 1.96  | 0.1770  | accept H <sub>0</sub>                    | no change              |
| 46      | 39  | 40  | 1610.5  | 1560.0  | 102.0      | 0.50  | 0.025                         | -1.96 | 0.6170  | accept H <sub>0</sub>                    | no change              |
| 47      | 39  | 37  | 1351.5  | 1424.5  | 96.2       | -0.76 | 0.025                         | 1.96  | 0.4472  | accept H <sub>0</sub>                    | no change              |
| 48      | 31  | 34  | 979.0   | 1023.0  | 76.1       | -0.58 | 0.025                         | -1.96 | 0.5620  | accept H <sub>0</sub>                    | no change              |
| 49      | 30  | 38  | 931.0   | 1035.0  | 81.0       | -1.28 | 0.025                         | -1.96 | 0.2006  | accept H <sub>0</sub>                    | no change              |
| 50      | 104 | 52  | 4255.5  | 4082.0  | 266.0      | 0.65  | 0.025                         | 1.96  | 0.5156  | accept H <sub>0</sub>                    | no change              |
| 51      | 146 | 81  | 8554.5  | 9234.0  | 474.0      | -1.43 | 0.025                         | 1.96  | 0.1528  | accept H <sub>0</sub>                    | no change              |
| 52      | 114 | 81  | 8500.5  | 7938.0  | 388.4      | 1.45  | 0.025                         | 1.96  | 0.1470  | accept H <sub>0</sub>                    | no change              |
| 53      | 47  | 74  | 2607.0  | 2867.0  | 188.0      | -1.38 | 0.025                         | -1.96 | 0.1676  | accept H <sub>0</sub>                    | no change              |
| 54      | 52  | 72  | 2689.0  | 3250.0  | 197.5      | -2.84 | 0.025                         | -1.96 | 0.0046  | reject H <sub>0</sub> at $\alpha$ = 0.01 | positive shift         |
| 55      | 61  | 66  | 3501.0  | 3904.0  | 207.2      | -1.94 | 0.025                         | -1.96 | 0.0524  | accept H <sub>0</sub>                    | no change              |
| 56      | 61  | 74  | 3806.0  | 4148.0  | 226.2      | -1.51 | 0.025                         | -1.96 | 0.1310  | accept H <sub>0</sub>                    | no change              |
| 57      | 48  | 77  | 3388.5  | 3024.0  | 197.0      | 1.85  | 0.025                         | -1.96 | 0.0644  | accept H <sub>0</sub>                    | no change              |
| 58      | 23  | 39  | 644.0   | 724.5   | 68.6       | -1.17 | 0.025                         | -1.96 | 0.2420  | accept H <sub>0</sub>                    | no change              |
| 59      | 41  | 40  | 1997.0  | 1640.0  | 105.9      | 3.37  | 0.025                         | 1.96  | <.01    | reject H <sub>0</sub> at $\alpha$ = 0.01 | positive shift         |
| 60      | 30  | 45  | 1117.5  | 1140.0  | 92.5       | -0.24 | 0.025                         | -1.96 | 0.8104  | accept H <sub>0</sub>                    | no change              |
| 61      | 75  | 142 | 8433.0  | 8175.0  | 439.9      | 0.59  | 0.025                         | -1.96 | 0.5552  | accept H <sub>0</sub>                    | no change              |
| 62      | 49  | 81  | 3642.0  | 3209.5  | 208.2      | 2.08  | 0.025                         | -1.96 | 0.0376  | reject H <sub>0</sub> at $\alpha$ = 0.05 | negative shift         |
| 63      | 45  | 106 | 3834.0  | 3420.0  | 245.8      | 1.68  | 0.025                         | -1.96 | 0.0930  | accept H <sub>0</sub>                    | no change              |
| 64      | 29  | 70  | 1827.5  | 1450.0  | 130.1      | 2.90  | 0.025                         | -1.96 | 0.0038  | reject H <sub>0</sub> at $\alpha$ = 0.01 | negative shift         |
| 65      | 32  | 63  | 1432.5  | 1536.0  | 127.0      | -0.81 | 0.025                         | -1.96 | 0.4180  | accept H <sub>0</sub>                    | no change              |
| 66      | 39  | 64  | 2412.0  | 2028.0  | 147.1      | 2.61  | 0.025                         | -1.96 | 0.0090  | reject H <sub>0</sub> at $\alpha$ = 0.01 | negative shift         |
| 67      | 95  | 127 | 8322.5  | 10592.5 | 473.5      | -4.79 | 0.025                         | -1.96 | <.01    | reject H <sub>0</sub> at $\alpha$ = 0.01 | positive shift         |
| 68      | 29  | 57  | 1865.5  | 1261.5  | 109.5      | 5.52  | 0.025                         | -1.96 | <.01    | reject H <sub>0</sub> at $\alpha$ = 0.01 | negative shift         |
| 69      | 19  | 51  | 931.0   | 674.5   | 75.7       | 3.39  | 0.025                         | -1.96 | <.01    | reject H <sub>0</sub> at $\alpha$ = 0.01 | negative shift         |
| 70      | 60  | 46  | 2594.0  | 2461.0  | 156.9      | 0.85  | 0.025                         | 1.96  | 0.3954  | accept H <sub>0</sub>                    | no change              |
| 71      | 100 | 61  | 4710.0  | 4941.0  | 287.0      | -0.80 | 0.025                         | 1.96  | 0.4238  | accept H <sub>0</sub>                    | no change              |
| 72      | 77  | 62  | 4183.0  | 4340.0  | 236.0      | -0.67 | 0.025                         | 1.96  | 0.5028  | accept H <sub>0</sub>                    | no change              |
| 73      | 53  | 54  | 2927.0  | 2862.0  | 160.5      | 0.40  | 0.025                         | -1.96 | 0.6892  | accept H <sub>0</sub>                    | no change              |
| 74      | 114 | 45  | 4444.0  | 3600.0  | 261.5      | 3.23  | 0.025                         | 1.96  | <.01    | reject H <sub>0</sub> at $\alpha$ = 0.01 | positive shift         |
| 75      | 137 | 60  | 5750.0  | 5940.0  | 368.3      | -0.52 | 0.025                         | 1.96  | 0.6030  | accept H <sub>0</sub>                    | no change              |
| 76      | 118 | 60  | 4986.0  | 5370.0  | 325.0      | -1.18 | 0.025                         | 1.96  | 0.2380  | accept H <sub>0</sub>                    | no change              |
| 77      | 117 | 55  | 4483.0  | 4757.5  | 304.6      | -0.90 | 0.025                         | 1.96  | 0.3682  | accept H <sub>0</sub>                    | no change              |
| 78      | 53  | 59  | 3258.0  | 2994.5  | 171.6      | 1.54  | 0.025                         | -1.96 | 0.1236  | accept H <sub>0</sub>                    | no change              |
| 79      | 84  | 65  | 3786.0  | 4875.0  | 261.2      | -4.17 | 0.025                         | 1.96  | <.01    | reject H <sub>0</sub> at $\alpha$ = 0.01 | negative shift         |
| 80      | 88  | 99  | 7723.5  | 8272.0  | 369.4      | -1.48 | 0.025                         | -1.96 | 0.1388  | accept H <sub>0</sub>                    | no change              |
| 81      | 94  | 124 | 7565.0  | 10293.0 | 461.2      | -5.92 | 0.025                         | -1.96 | <.01    | reject H <sub>0</sub> at $\alpha$ = 0.01 | positive shift         |
| 82      | 27  | 22  | 348.0   | 550.0   | 49.7       | -4.06 | 0.025                         | 1.96  | <.01    | reject H <sub>0</sub> at $\alpha$ = 0.01 | negative shift         |
| 83      | 27  | 36  | 1099.0  | 864.0   | 72.0       | 3.26  | 0.025                         | -1.96 | <.01    | reject H <sub>0</sub> at $\alpha$ = 0.01 | negative shift         |
| 84      | 51  | 36  | 1646.0  | 1584.0  | 116.0      | 0.53  | 0.025                         | 1.96  | 0.5962  | accept H <sub>0</sub>                    | no change              |
| 85      | 16  | 37  | 547.0   | 432.0   | 51.6       | 2.23  | 0.025                         | -1.96 | 0.0258  | reject H <sub>0</sub> at $\alpha$ = 0.05 | negative shift         |
| 86      | 86  | 43  | 3189.0  | 2795.0  | 200.2      | 1.97  | 0.025                         | 1.96  | 0.0488  | reject H <sub>0</sub> at $\alpha$ = 0.05 | positive shift         |
| 87      | 153 | 41  | 3907.5  | 3997.5  | 319.3      | -0.28 | 0.025                         | 1.96  | 0.7794  | accept H <sub>0</sub>                    | no change              |
| 88      | 84  | 70  | 5578.0  | 5425.0  | 275.6      | 0.56  | 0.025                         | 1.96  | 0.5754  | accept H <sub>0</sub>                    | no change              |
