# Supplementary material
Source: MDPI journal article supplement (https://www.mdpi.com/2306-5338/6/3/67)
Supplement: s1 [file s1]

**Table S1:** Z test results to determine if the means of the pre-mine and post-mine log-transformed discharge populations are different and the null hypothesis, H<sub>0</sub>, can be rejected. Negative variance of the difference, x1-x2, indicates a statistically significant increase in the post-mine geometric mean and positive variance of the difference indicates a statistically significant decrease in the post-mine geometric mean. Data compared to published critical values of z at alpha = 0.05 and fit to a two-tailed test.

| Site ID | x1     | s1   | n1  | x2     | s2   | n2  | μ1-μ2 | critical value<br>(α/2) <sup>(1)</sup> |      | z       | p-value | Confidence Interval |        | Decision                                           |
|---------|--------|------|-----|--------|------|-----|-------|----------------------------------------|------|---------|---------|---------------------|--------|----------------------------------------------------|
| 1       | 2.16   | 0.85 | 62  | 2.42   | 0.80 | 90  | 0     | 0.025                                  | 1.96 | (1.90)  | 0.0574  | (0.53)              | 0.01   | accept H <sub>0</sub>                              |
| 2       | 1.74   | 1.27 | 73  | 1.73   | 1.33 | 79  | 0     | 0.025                                  | 1.96 | 0.05    | 0.9602  | (0.40)              | 0.42   | accept H <sub>0</sub>                              |
| 3       | 1.80   | 1.05 | 40  | 1.99   | 1.00 | 80  | 0     | 0.025                                  | 1.96 | (0.95)  | 0.3422  | (0.58)              | 0.20   | accept H <sub>0</sub>                              |
| 4       | 0.90   | 1.22 | 71  | 2.11   | 0.66 | 93  | 0     | 0.025                                  | 1.96 | (7.56)  | <.01    | (1.52)              | (0.90) | reject H <sub>0</sub> ; increase to geometric mean |
| 5       | 1.48   | 1.17 | 67  | 0.75   | 1.45 | 94  | 0     | 0.025                                  | 1.96 | 3.53    | <.01    | 0.32                | 1.14   | reject H <sub>0</sub> ; decrease to geometric mean |
| 6       | 0.75   | 0.91 | 116 | 0.70   | 1.01 | 117 | 0     | 0.025                                  | 1.96 | 0.40    | 0.6892  | (0.20)              | 0.30   | accept H <sub>0</sub>                              |
| 7       | 0.83   | 1.05 | 43  | 0.26   | 1.38 | 35  | 0     | 0.025                                  | 1.96 | 2.01    | 0.0444  | 0.02                | 1.12   | reject H <sub>0</sub> ; decrease to geometric mean |
| 8       | 0.83   | 0.75 | 44  | 1.03   | 0.92 | 38  | 0     | 0.025                                  | 1.96 | (1.07)  | 0.2846  | (0.57)              | 0.17   | accept H <sub>0</sub>                              |
| 9       |        |      |     |        |      |     |       |                                        |      |         |         |                     |        |                                                    |
| 10      | 0.93   | 1.30 | 51  | 0.10   | 1.41 | 109 | 0     | 0.025                                  | 1.96 | 3.66    | <.01    | 0.39                | 1.27   | reject H <sub>0</sub> ; decrease to geometric mean |
| 11      | 0.95   | 1.08 | 62  | 0.52   | 1.34 | 114 | 0     | 0.025                                  | 1.96 | 2.31    | 0.0208  | 0.07                | 0.79   | reject H <sub>0</sub> ; decrease to geometric mean |
| 12      | 0.74   | 1.05 | 48  | 0.41   | 1.11 | 115 | 0     | 0.025                                  | 1.96 | 1.80    | 0.0718  | (0.03)              | 0.69   | accept H <sub>0</sub>                              |
| 13      | 0.47   | 0.83 | 45  | (0.16) | 1.01 | 111 | 0     | 0.025                                  | 1.96 | 4.03    | <.01    | 0.32                | 0.94   | reject H <sub>0</sub> ; decrease to geometric mean |
| 14      | 1.42   | 1.93 | 82  | 2.87   | 1.24 | 91  | 0     | 0.025                                  | 1.96 | (5.81)  | <.01    | (1.94)              | (0.96) | reject H <sub>0</sub> ; increase to geometric mean |
| 15      | 1.76   | 1.39 | 82  | 2.94   | 1.01 | 105 | 0     | 0.025                                  | 1.96 | (6.47)  | <.01    | (1.54)              | (0.82) | reject H <sub>0</sub> ; increase to geometric mean |
| 16      | 1.87   | 1.08 | 147 | 2.60   | 0.55 | 31  | 0     | 0.025                                  | 1.96 | (5.49)  | <.01    | (0.99)              | (0.47) | reject H <sub>0</sub> ; increase to geometric mean |
| 17      | 1.63   | 0.98 | 101 | 2.45   | 0.63 | 39  | 0     | 0.025                                  | 1.96 | (5.84)  | <.01    | (1.10)              | (0.54) | reject H <sub>0</sub> ; increase to geometric mean |
| 18      | 1.48   | 1.50 | 131 | 2.08   | 0.67 | 36  | 0     | 0.025                                  | 1.96 | (3.48)  | <.01    | (0.94)              | (0.26) | reject H <sub>0</sub> ; increase to geometric mean |
| 19      | 0.08   | 1.37 | 114 | 1.35   | 1.01 | 71  | 0     | 0.025                                  | 1.96 | (7.23)  | <.01    | (1.61)              | (0.93) | reject H <sub>0</sub> ; increase to geometric mean |
| 20      | 1.05   | 1.14 | 89  | 1.54   | 0.63 | 66  | 0     | 0.025                                  | 1.96 | (3.41)  | <.01    | (0.77)              | (0.21) | reject H <sub>0</sub> ; increase to geometric mean |
| 21      | 0.76   | 0.60 | 62  | 1.59   | 0.48 | 68  | 0     | 0.025                                  | 1.96 | (8.66)  | <.01    | (1.02)              | (0.64) | reject H <sub>0</sub> ; increase to geometric mean |
| 22      | 0.14   | 1.09 | 48  | (0.75) | 0.62 | 67  | 0     | 0.025                                  | 1.96 | 5.10    | <.01    | 0.55                | 1.23   | reject H <sub>0</sub> ; decrease to geometric mean |
| 23      | 1.15   | 1.27 | 257 | 2.27   | 0.51 | 72  | 0     | 0.025                                  | 1.96 | (11.26) | <.01    | (1.31)              | (0.93) | reject H <sub>0</sub> ; increase to geometric mean |
| 24      | 1.31   | 1.12 | 118 | 1.54   | 0.98 | 76  | 0     | 0.025                                  | 1.96 | (1.51)  | 0.131   | (0.53)              | 0.07   | accept H <sub>0</sub>                              |
| 25      | 1.28   | 0.95 | 83  | 1.37   | 0.86 | 58  | 0     | 0.025                                  | 1.96 | (0.59)  | 0.5552  | (0.39)              | 0.21   | accept H <sub>0</sub>                              |
| 26      | 0.97   | 0.67 | 112 | 1.01   | 0.82 | 57  | 0     | 0.025                                  | 1.96 | (0.32)  | 0.749   | (0.29)              | 0.21   | accept H <sub>0</sub>                              |
| 27      | 0.92   | 1.47 | 85  | 1.49   | 1.34 | 32  | 0     | 0.025                                  | 1.96 | (2.00)  | 0.0456  | (1.13)              | (0.01) | reject H <sub>0</sub> ; increase to geometric mean |
| 28      | 1.05   | 0.92 | 88  | 1.87   | 0.76 | 32  | 0     | 0.025                                  | 1.96 | (4.93)  | <.01    | (1.15)              | (0.49) | reject H <sub>0</sub> ; increase to geometric mean |
| 29      | 1.26   | 0.86 | 56  | 1.85   | 0.69 | 62  | 0     | 0.025                                  | 1.96 | (4.08)  | <.01    | (0.87)              | (0.31) | reject H <sub>0</sub> ; increase to geometric mean |
| 30      | 1.19   | 0.78 | 111 | 1.75   | 0.48 | 36  | 0     | 0.025                                  | 1.96 | (5.14)  | <.01    | (0.77)              | (0.35) | reject H <sub>0</sub> ; increase to geometric mean |
| 31      | 1.18   | 0.81 | 35  | 0.14   | 1.11 | 100 | 0     | 0.025                                  | 1.96 | 5.90    | <.01    | 0.69                | 1.39   | reject H <sub>0</sub> ; decrease to geometric mean |
| 32      | 0.46   | 0.69 | 40  | (0.63) | 0.60 | 104 | 0     | 0.025                                  | 1.96 | 8.79    | <.01    | 0.85                | 1.33   | reject H <sub>0</sub> ; decrease to geometric mean |
| 33      | 0.45   | 0.79 | 97  | 0.54   | 0.85 | 64  | 0     | 0.025                                  | 1.96 | (0.68)  | 0.4966  | (0.35)              | 0.17   | accept H <sub>0</sub>                              |
| 34      | 0.45   | 0.83 | 130 | (0.83) | 0.60 | 64  | 0     | 0.025                                  | 1.96 | 12.25   | <.01    | 1.08                | 1.48   | reject H <sub>0</sub> ; decrease to geometric mean |
| 35      | 1.79   | 0.96 | 188 | 1.78   | 1.00 | 85  | 0     | 0.025                                  | 1.96 | 0.08    | 0.9362  | (0.24)              | 0.26   | accept H <sub>0</sub>                              |
| 36      | 1.13   | 1.07 | 49  | 1.79   | 0.61 | 79  | 0     | 0.025                                  | 1.96 | (3.94)  | <.01    | (0.99)              | (0.33) | reject H <sub>0</sub> ; increase to geometric mean |
| 37      | 0.74   | 0.95 | 61  | 0.84   | 0.86 | 72  | 0     | 0.025                                  | 1.96 | (0.63)  | 0.5286  | (0.41)              | 0.21   | accept H <sub>0</sub>                              |
| 38      | 0.73   | 1.05 | 99  | (0.35) | 1.07 | 70  | 0     | 0.025                                  | 1.96 | 6.51    | <.01    | 0.76                | 1.40   | reject H <sub>0</sub> ; decrease to geometric mean |
| 39      | 0.07   | 0.96 | 56  | (0.21) | 0.76 | 59  | 0     | 0.025                                  | 1.96 | 1.73    | 0.0836  | (0.04)              | 0.60   | accept H <sub>0</sub>                              |
| 40      | 3.02   | 0.92 | 55  | 3.03   | 0.63 | 48  | 0     | 0.025                                  | 1.96 | (0.07)  | 0.9442  | (0.31)              | 0.29   | accept H <sub>0</sub>                              |
| 41      | 3.10   | 0.79 | 103 | 3.09   | 0.71 | 34  | 0     | 0.025                                  | 1.96 | 0.07    | 0.9442  | (0.27)              | 0.29   | accept H <sub>0</sub>                              |
| 42      | 3.19   | 1.00 | 39  | 3.01   | 0.63 | 31  | 0     | 0.025                                  | 1.96 | 0.92    | 0.3576  | (0.20)              | 0.56   | accept H <sub>0</sub>                              |
| 43      | 1.01   | 1.15 | 109 | 1.44   | 0.78 | 48  | 0     | 0.025                                  | 1.96 | (2.73)  | <.01    | (0.74)              | (0.12) | reject H <sub>0</sub> ; increase to geometric mean |
| 44      | 0.90   | 1.03 | 108 | 0.84   | 1.11 | 56  | 0     | 0.025                                  | 1.96 | 0.34    | 0.7338  | (0.29)              | 0.41   | accept H <sub>0</sub>                              |
| 45      | 0.55   | 1.17 | 128 | 0.38   | 1.08 | 55  | 0     | 0.025                                  | 1.96 | 0.95    | 0.3422  | (0.18)              | 0.52   | accept H <sub>0</sub>                              |
| 46      | 1.81   | 0.86 | 39  | 1.68   | 0.92 | 40  | 0     | 0.025                                  | 1.96 | 0.65    | 0.5156  | (0.26)              | 0.52   | accept H <sub>0</sub>                              |
| 47      | 1.84   | 0.84 | 39  | 1.54   | 1.12 | 37  | 0     | 0.025                                  | 1.96 | 1.32    | 0.1868  | (0.15)              | 0.75   | accept H <sub>0</sub>                              |
| 48      | 1.52   | 0.82 | 31  | 1.66   | 0.57 | 34  | 0     | 0.025                                  | 1.96 | (0.79)  | 0.4296  | (0.49)              | 0.21   | accept H <sub>0</sub>                              |
| 49      | 1.28   | 0.75 | 30  | 1.51   | 0.55 | 38  | 0     | 0.025                                  | 1.96 | (1.41)  | 0.1586  | (0.55)              | 0.09   | accept H <sub>0</sub>                              |
| 50      | 1.31   | 1.50 | 104 | 1.51   | 1.37 | 52  | 0     | 0.025                                  | 1.96 | (0.83)  | 0.4066  | (0.67)              | 0.27   | accept H <sub>0</sub>                              |
| 51      | 1.78   | 0.69 | 146 | 1.21   | 1.46 | 81  | 0     | 0.025                                  | 1.96 | 3.31    | <.01    | 0.23                | 0.91   | reject H <sub>0</sub> ; decrease to geometric mean |
| 52      | 1.64   | 0.85 | 114 | 1.70   | 1.04 | 81  | 0     | 0.025                                  | 1.96 | (0.43)  | 0.6672  | (0.34)              | 0.22   | accept H <sub>0</sub>                              |
| 53      | 1.33   | 0.76 | 47  | 1.45   | 0.99 | 74  | 0     | 0.025                                  | 1.96 | (0.75)  | 0.4532  | (0.43)              | 0.19   | accept H <sub>0</sub>                              |
| 54      | 0.55   | 0.78 | 52  | 0.91   | 0.72 | 72  | 0     | 0.025                                  | 1.96 | (2.62)  | <.01    | (0.63)              | (0.09) | reject H <sub>0</sub> ; increase to geometric mean |
| 55      | 1.80   | 1.02 | 61  | 2.12   | 0.92 | 66  | 0     | 0.025                                  | 1.96 | (1.85)  | 0.0644  | (0.66)              | 0.02   | accept H <sub>0</sub>                              |
| 56      | 1.76   | 0.91 | 61  | 1.89   | 1.15 | 74  | 0     | 0.025                                  | 1.96 | (0.73)  | 0.4654  | (0.48)              | 0.22   | accept H <sub>0</sub>                              |
| 57      | 1.75   | 0.62 | 48  | 1.31   | 1.06 | 77  | 0     | 0.025                                  | 1.96 | 2.93    | <.01    | 0.15                | 0.73   | reject H <sub>0</sub> ; decrease to geometric mean |
| 58      |        |      |     |        |      |     |       |                                        |      |         |         |                     |        |                                                    |
| 59      | 0.62   | 1.30 | 41  | 1.64   | 0.56 | 40  | 0     | 0.025                                  | 1.96 | (4.61)  | <.01    | (1.45)              | (0.59) | accept H <sub>0</sub>                              |
| 60      | 0.18   | 0.99 | 30  | 0.19   | 1.28 | 45  | 0     | 0.025                                  | 1.96 | (0.04)  | 0.968   | (0.53)              | 0.51   | accept H <sub>0</sub>                              |
| 61      | 0.46   | 1.43 | 75  | 0.38   | 1.36 | 142 | 0     | 0.025                                  | 1.96 | 0.40    | 0.6892  | (0.31)              | 0.47   | accept H <sub>0</sub>                              |
| 62      | 1.50   | 0.86 | 49  | 1.21   | 0.95 | 81  | 0     | 0.025                                  | 1.96 | 1.79    | 0.0734  | (0.03)              | 0.61   | accept H <sub>0</sub>                              |
| 63      | 1.38   | 0.74 | 45  | 1.33   | 0.55 | 106 | 0     | 0.025                                  | 1.96 | 0.41    | 0.6818  | (0.19)              | 0.29   | accept H <sub>0</sub>                              |
| 64      |        |      |     |        |      |     |       |                                        |      |         |         |                     |        |                                                    |
| 65      | 0.41   | 1.26 | 32  | 0.71   | 0.77 | 63  | 0     | 0.025                                  | 1.96 | (1.23)  | 0.2186  | (0.78)              | 0.18   | accept H <sub>0</sub>                              |
| 66      | (0.49) | 0.81 | 39  | (1.00) | 0.00 | 64  | 0     | 0.025                                  | 1.96 | 3.93    | <.01    | 0.26                | 0.76   | reject H <sub>0</sub> ; decrease to geometric mean |
| 67      | (0.09) | 1.18 | 95  | 0.76   | 1.20 | 127 | 0     | 0.025                                  | 1.96 | (5.27)  | <.01    | (1.17)              | (0.53) | reject H <sub>0</sub> ; increase to geometric mean |
| 68      |        |      |     |        |      |     |       |                                        |      |         |         |                     |        |                                                    |
| 69      |        |      |     |        |      |     |       |                                        |      |         |         |                     |        |                                                    |
| 70      | 3.22   | 1.01 | 60  | 3.48   | 0.64 | 46  | 0     | 0.025                                  | 1.96 | (1.62)  | 0.1802  |                     |        | accept H <sub>0</sub>                              |
| 71      | 3.41   | 0.88 | 100 | 3.38   | 0.73 | 61  |       |                                        |      | 0.23    | 0.818   |                     |        | accept H <sub>0</sub>                              |
| 72      | 3.42   | 0.91 | 77  | 3.40   | 0.72 | 62  |       |                                        |      | 0.14    | 0.8886  |                     |        | accept H <sub>0</sub>                              |
| 73      | 3.22   | 1.01 | 53  | 3.27   | 0.63 | 54  |       |                                        |      | (0.31)  | 0.7566  |                     |        | accept H <sub>0</sub>                              |
| 74      | 2.76   | 1.04 | 114 | 3.39   | 0.55 | 45  | 0     | 0.025                                  | 1.96 | (4.95)  | <.01    |                     |        | reject H <sub>0</sub> ; increase to geometric mean |
| 75      | 3.32   | 0.94 | 137 | 3.35   | 0.68 | 60  |       |                                        |      | (0.25)  | 0.8026  |                     |        | accept H <sub>0</sub>                              |
| 76      | 3.44   | 0.78 | 118 | 3.37   | 0.67 | 60  |       |                                        |      | 0.62    | 0.5352  |                     |        | accept H <sub>0</sub>                              |
| 77      | 3.31   | 0.92 | 117 | 3.32   | 0.60 | 55  |       |                                        |      | (0.09)  | 0.9282  |                     |        | accept H <sub>0</sub>                              |
| 78      | 3.36   | 0.92 | 53  | 3.26   | 0.59 | 59  | 0     | 0.025                                  | 1.96 | 0.68    | 0.4966  | (0.19)              | 0.39   | accept H <sub>0</sub>                              |
| 79      | 3.59   | 0.67 | 84  | 3.11   | 0.74 | 65  | 0     | 0.025                                  | 1.96 | 4.09    | <.01    | 0.25                | 0.71   | reject H <sub>0</sub> ; decrease to geometric mean |
| 80      | (0.04) | 1.27 | 88  | 0.23   | 1.13 | 99  | 0     | 0.025                                  | 1.96 | (1.53)  | 0.126   | (0.62)              | 0.08   | accept H <sub>0</sub>                              |
| 81      | 0.27   | 1.11 | 94  | 1.19   | 0.57 | 124 | 0     | 0.025                                  | 1.96 | (7.34)  | <.01    | (1.17)              | (0.67) | reject H <sub>0</sub> ; increase to geometric mean |
| 82      |        |      |     |        |      |     |       |                                        |      |         |         |                     |        |                                                    |
| 83      |        |      |     |        |      |     |       |                                        |      |         |         |                     |        |                                                    |
| 84      | 0.71   | 0.60 | 51  | 0.75   | 0.56 | 36  |       |                                        |      | (0.32)  | 0.749   |                     |        | accept H <sub>0</sub>                              |
| 85      |        |      |     |        |      |     |       |                                        |      |         |         |                     |        |                                                    |
| 86      | 1.31   | 1.14 | 86  | 1.55   | 1.46 | 43  | 0     | 0.025                                  | 1.96 | (0.94)  | 0.3472  | (0.74)              | 0.26   | accept H <sub>0</sub>                              |
| 87      | 1.58   | 1.04 | 153 | 1.36   | 1.40 | 41  | 0     | 0.025                                  | 1.96 | 0.94    | 0.3472  | (0.24)              | 0.68   | accept H <sub>0</sub>                              |
| 88      | 0.54   | 1.25 | 84  | 0.67   | 1.29 | 70  | 0     | 0.025                                  | 1.96 | (0.63)  | 0.5286  | (0.53)              | 0.27   | accept H <sub>0</sub>                              |
